# Supplementary material for: Facile one-pot synthesis of 3D graphite–SiO2 composite foam for negative resistance devices
Source: Royal Society of Chemistry journal article supplement (doi:10.1039/c7ra07465d), 2017-01-01
Supplement: c7ra07465d1.pdf [file c7ra07465d1.pdf]

**Supplementary information:**

**1. Theory of charge shifting amount.**

In this section, a theory is derived in terms of charge shifting amount, which could be used to discuss the electric performance of the graphite-SiO<sub>2</sub> foam.

The localized electric field is constructed when voltages are applied on the two terminals of the sample. This localized electric field would introduce charge carriers as well as current. Charges would be redistributed in space. A charge dynamic process would be introduced at the interface between the metal oxide particle and the graphite particle. A charge  $q_A$  in position  $x_A$  is supposed to be replaced by another charge  $q_B$  in position  $x_B$ . An electric force associated with the localized electric field would apply to the charge  $q_A$  and change its position. If the charge is shifted with a distance  $x$ , then  $x=vt$ , where  $t$  is certain time scale and  $v$  is the charge shifting velocity.

Using a simple lattice gas model and assuming that  $n_A$  positive charges and  $n_B$  negative charges are occupying  $n$  lattice sites. The total free energy may be given as

$$f = e\phi(n_A - n_B) + an_A^2 + bn_B^2 + cn_A n_B - k_B T \ln \frac{n!}{(n - n_A - n_B)! n_A! n_B!} \quad (\text{S.1})$$

Here,  $\phi$  is the electrostatic potential;  $a$ ,  $b$  and  $c$  are the constants that represent the interactions between the positive charges, the negative charges, and between the positive and negative charges, respectively. The last term is the entropy of the total charge distribution in all available sites. Using Stirling approximation ( $\ln n! \approx n \ln n - n$ ), Eq. (S.1) could be derived as

$$f = e\phi(n_A - n_B) + an_A^2 + bn_B^2 + cn_A n_B - k_B T [\ln n! - (n - n_A - n_B) \ln(n - n_A - n_B) + n - n_A \ln n_A - n_B \ln n_B] \quad (\text{S.2})$$

The derivative of Eq. (S.2) could be taken as

$$\frac{\partial F}{\partial n_A} = e\phi + 2an_A + cn_B - k_B T \ln \frac{n - n_A - n_B}{n_A} \quad (\text{S.3})$$

and

$$\frac{\partial F}{\partial n_B} = -e\phi + 2bn_B + cn_A - k_B T \ln \frac{n - n_A - n_B}{n_B} \quad (\text{S.4})$$

For calculation simplicity,  $a$ ,  $b$  and  $c$  are assumed as zero. The free energy would be in its minimum when the whole system is in equilibrium state. Using the condition that its derivative is zero, two equations are derived:

$$\frac{n - n_A - n_B}{n_B} = \exp\left(\frac{-e\phi}{k_B T}\right) \quad (\text{S.5})$$

and,

$$\frac{n - n_A - n_B}{n_A} = \exp\left(\frac{e\phi}{k_B T}\right) \quad (\text{S.6})$$

which could be further derived as

$$\frac{n_A}{n_B} = \exp\left(\frac{-2e\phi}{k_B T}\right) \quad (\text{S.7})$$

If the total volume of the system is  $V$ , then the equilibrium charge concentrations at these two positions  $cc_A$  and  $cc_B$  could be expressed as  $cc_A = n_A/V$  and  $cc_B = n_B/V$ .

Then the ratio of the concentrations is derived as

$$\frac{cc_A}{cc_B} = \exp\left(\frac{-2e\phi(x)}{k_B T}\right) \quad (\text{S.8})$$

Here the electrostatic potential  $\phi$  is depended on the charge shifting distance  $x$ . The total charge concentration  $cc$  generated is considered as a constant, which is  $cc_A + cc_B = cc$ .

It is easy to generate

$$cc_A = \frac{cc \exp(\eta)}{1 + \exp(\eta)} \quad (\text{S.9})$$

and

$$cc_B = \frac{cc}{1 + \exp(\eta)} \quad (\text{S.10})$$

Here  $\tau$  is given by

$$\eta = \frac{2q\phi(x)}{kT} = \frac{2q\phi(vt_0)}{kT} \quad (\text{S.11})$$

Using Poission's law, the charge density and the potential should satisfy

$$\frac{d^2\phi(x)}{dx^2} = \frac{-\rho(x)}{\varepsilon}$$

(S.12)

The charge density could be expressed as .

$$\rho(x) = F(cc_B - cc_A) = \frac{F(\exp(\eta) - 1)cc}{1 + \exp(\eta)} \quad (S.13)$$

Where  $F$  is the Faraday constant. It is important to note that the charge  $q$  satisfies

$$-q = \int_x^\infty \rho(l)dl \quad (S.14)$$

Combining Eq. (S. 13) and Eq. (S. 14), we can derive,

$$q = -FC[2\ln 2 - 2\ln(e^\eta + 1) + \ln e^\eta] \quad (S.15)$$

which establish the relation of  $q$  with  $\eta$ .

Combining Eq. (S.12) and Eq. (S.13), we can generate,

$$\frac{d^2\eta}{dx^2} = \frac{-Fc \exp(\eta) - 1}{\varepsilon \exp(\eta) + 1} \quad (S.16)$$

which could be derived as

$$\frac{d\eta}{dx} = \sqrt{\frac{2Fc}{\varepsilon} [\ln e^\eta - 2\ln(1 + e^\eta)]} \quad (S.17)$$

The electric polarization could be expressed as

$$P = \gamma \frac{\partial q}{\partial w} = \gamma \frac{\partial q}{\partial \eta} \frac{\partial \eta}{\partial w} = \frac{2\gamma QFc}{kT} \left( 1 - \frac{2e^\eta}{e^\eta + 1} \right) \quad (S.18)$$

Where  $\gamma = LE_0/A$  is the constant that defined by sample length  $L$ , sample area  $A$  and the electric field  $E_0$  at certain space. Using the well-known electrical polarization expression

$$P = \varepsilon_0(\varepsilon_r - 1)E_0 \approx \varepsilon_0\varepsilon_r E_0 \quad (S.19)$$

and the Mott-Gurney equation,

$$I = (9/8)(A\varepsilon_0\varepsilon_r\mu V_0^2 / L^3) \quad (S.20)$$

the current could be calculated as

$$I = \frac{9\mu V_0^2 Q_0 Fc}{4L^2 kT} \left( 1 - \frac{2e^\eta}{e^\eta + 1} \right) \quad (S.21)$$

Where  $\varepsilon_0$  is the free space permittivity,  $\varepsilon_r$  is the relative permittivity,  $V_0$  is the voltage associated with  $E_0$ ,  $\mu$  is permeability,  $I$  is the current. If we consider the potential of the point charge and use Eq. (S.11), the potential  $\phi$  could be expressed as

$$\phi(v) = \frac{q}{kT} \frac{Q}{2\pi\varepsilon_0 x} = \frac{q}{kT} \frac{Q}{2\pi\varepsilon_0 vt}$$

(S.22)

Where  $Q$  is the charge shifting amount.

Using Eq. (S.11) and Eq. (S.21), we can derive

$$\eta = \frac{q^2 Q}{k^2 T^2 \pi \varepsilon_0 t v} \quad (S.23)$$

Substituting Eq. (S.22) into Eq. (S.20), the current could be expressed as

$$I = \frac{9\mu V_0^2 Q_0 Fc}{4L^2 kT} \left\{ 1 - \frac{2\exp[q^2 Q / (k^2 T^2 \pi \varepsilon_0 t v)]}{\exp[q^2 Q / (k^2 T^2 \pi \varepsilon_0 t v)] + 1} \right\} \quad (S.24)$$

Which has established the relation between the current and the charge shifting amount.

2. The XPS survey of the sample.

Figure S.1 shows the XPS survey of the sample. The peaks at 982 eV, 552 eV, 28.4 eV are caused by the background noise.

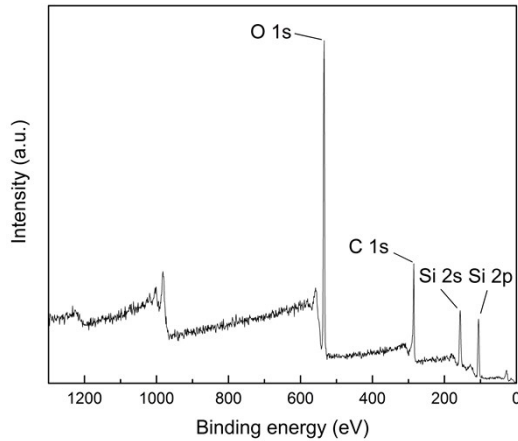

Figure S.1 The XPS survey of the graphite-SiO<sub>2</sub> composite foam.
